# Supplementary material for: Historical Biogeography and Diversification of Truffles in the Tuberaceae and Their Newly Identified Southern Hemisphere Sister Lineage
Source: PLoS One. 2013 Jan 2;8(1):e52765. doi: 10.1371/journal.pone.0052765 (PMC3534693; doi:10.1371/journal.pone.0052765)
Supplement: Table S1 — Collection information and GenBank accession information for taxa sampled. (XLS) [file pone.0052765.s001.xls]

## Sheet: Sheet1
Table S1-Taxa used in the presented study and GenBank accession numbers of their sequences
Taxa Name in Analysis	Taxon name	Lineage	Host Phylum	Tuber spore ornamentation	Collection (ID) number	Country	ITS Genbank	LSU Genbank	EF1a Genbank	RPB2 Genbank
Balsamia MES84	Balsamia cf. setchellii	/helvella	unknown		MES84	USA		JQ925657	GU596458	JQ954467
Balsamia SRC395	Balsamia cf. setchellii	/helvella	unknown		SRC395	USA		JQ925658		JQ954468
Balsamia SRC868	Balsamia cf. setchellii	/helvella	unknown		SRC868	USA		JQ925659	GU596459	JQ954469
Choiromyces alveolatus 97	Choiromyces alveolatus	/choiromyces	angiosperm		MES97	USA	HM485332	JQ925660		JQ954470
Choiromyces meandriformis DL Oregon	Choiromyces meandriformis	/choiromyces	angiosperm & gymnosperm		GB285	USA	HM485331			JQ954472
Choiromyces meandriformis RH691 Iowa	Choiromyces meandriformis	/choiromyces	angiosperm & gymnosperm		RH691	USA	HM485330		JX022550	JQ954471
Dingleya JT20122 Australia	Dingleya sp4	/labyrinthomyces	angiosperm		JT20122	Australia	JQ925626		JX022551
Dingleya JT27860 Australia	Dingleya sp3	/labyrinthomyces	angiosperm		JT27860	Australia	GQ221457		JX022554
Dingleya JT31575 Australia	Dingleya sp1	/labyrinthomyces	angiosperm		JT31575	Australia	HM485334	JQ925661		JQ954473
Dinglyea JT27686 Australia	Dingleya sp2	/labyrinthomyces	angiosperm		JT27686	Australia	JQ925627		JX022552
Dinglyea JT31036 Australia	Dingleya sp1	/labyrinthomyces	angiosperm		JT31036	Australia	JQ925628		JX022553
Gymnohydnotrya australiana JT19760	Gymnohydnotrya australiana	/gymnohydnotrya	angiosperm		JT19760	Australia		JQ925662	JX022556	JQ954474
Gymnohydnotrya australiana OSC130601	Gymnohydnotrya australiana	/gymnohydnotrya	angiosperm		OSC130601	Australia	JQ925629	JQ925663	JX022555	JQ954475
Gymnohydnotrya echinulata clar4529	Gymnohydnotrya echinulata	/gymnohydnotrya	angiosperm		clar4529	Australia	JQ925630	JQ925664
Helvella acetabulum MES215	Helvella acetabulum	/helvella	unknown		MES215	USA				JQ954476
Helvella lacunosa MES218	Helvella lacunosa	/helvella	unknown		MES218	USA		JQ925665	GU596456	JQ954477
Helvella lacunosa MES286b	Helvella lacunosa	/helvella	unknown		MES286	USA		JQ925666		JQ954478
Helvella macropus MES198	Helvella macropus	/helvella	unknown		MES198	USA		JQ925667		JQ954479
L C02 EcM Salix humboldtiana Argentina	EcM on Salix humboldtiana	/puberulum	angiosperm		L C02	Argentina	JQ925631	JQ925668
L C04 EcM Salix humboldtiana Argentina	EcM on Salix humboldtiana	/puberulum	angiosperm		L C04	Argentina	JQ925632	JQ925669
Labyrinthomyces JT25359 Australia	Labyrinthomyces sp1	/labyrinthomyces	angiosperm		JT25359	Australia	JQ925633		JX022559
Labyrinthomyces JT27750 Australia	Labyrinthomyces sp3	/labyrinthomyces	angiosperm		JT27750	Australia	HM485335	JQ925670		JQ954480
Labyrinthomyces JT28801 Australia	Labyrinthomyces sp2	/labyrinthomyces	angiosperm		JT28801	Australia	JQ925634		JX022560
Labyrinthomyces JT28821 Australia	Labyrinthomyces sp3	/labyrinthomyces	angiosperm		JT28821	Australia	JQ925635			JQ954481
Leppia holotype Australia	Tuberaceae sp1	/labyrinthomyces	angiosperm		holotype	Australia	JQ925636	JQ925671	JX022557
Leppia JT28813 Australia	Tuberaceae sp2	/labyrinthomyces	angiosperm		JT28813	Australia	JQ925637	JQ925672	JX022558
Nothojafnea cf thaxterii N10 Argentina	Nothojafnea cf thaxterii	/labyrinthomyces	angiosperm		N10	Argentina	JQ925638	JQ925673	JX022561	JQ954482
P5M4 5a EcM Nothofagus obliqua Argentina	EcM on Nothofagus obliqua	/gymnohydnotrya	angiosperm		P5M4 5a	Argentina	JQ925639	JQ925674
R8M8 7x EcM Nothofagus alpina Argentina	EcM on Nothofagus alpina	/puberulum	angiosperm		R8M8 7x	Argentina	JQ925640	JQ925675
Reddellomyces JT27723 Australia	Reddellomyces sp1	/labyrinthomyces	angiosperm		JT27723	Australia	JQ925641	JQ925676		JQ954483
Reddellomyces JT27724 Australia	Reddellomyces sp2	/labyrinthomyces	angiosperm		JT27724	Australia	HM485336	JQ925677		JQ954484
Reddellomyces JT27799 Australia	Reddellomyces sp3	/labyrinthomyces	angiosperm		JT27799	Australia			JX022562
Reddellomyces JT4985 Australia	Reddellomyces sp4	/labyrinthomyces	angiosperm		JT4985	Australia	JQ925642		JX022564	JQ954485
Reddellomyces JT6873 Australia	Reddellomyces sp5	/labyrinthomyces	angiosperm		JT6873	Australia	HM485337	JQ925678	JX022563	JQ954486
Tuber aestivum China GQ217542	Tuber aestivum	/aestivum	angiosperm & gymnosperm	reticulated	GQ217542	China	GQ217542
Tuber aestivum GB202 Italy	Tuber aestivum	/aestivum	angiosperm & gymnosperm	reticulated	GB202	Italy		JQ925679	JX022565	JQ954487
Tuber aestivum JT30500 Sweden	Tuber aestivum	/aestivum	angiosperm & gymnosperm	reticulated	JT30500	Sweden	HM485340			JQ954488
Tuber aestivum OSC61974 Serbia	Tuber aestivum	/aestivum	angiosperm & gymnosperm	reticulated	OSC61974	Serbia			JX022566
Tuber anniae JT13209 Washington holotype	Tuber anniae	/puberulum	angiosperm & gymnosperm	reticulated	JT13209	USA	HM485338	JQ925680	JX022567
Tuber anniae JT22695 Oregon	Tuber anniae	/puberulum	angiosperm & gymnosperm	reticulated	JT22695	USA	HM485339	JQ925681	JX022568
Tuber asa M1828 Italy	Tuber asa=Tuber oligospermum	/puberulum	angiosperm	reticulated	M1828	Italy	HM485341		JX022569	JQ954489
Tuber bellisporum JT11679 Oregon holotype	Tuber bellisporum	/gibbosum	gymnosperm	reticulated	JT11679	USA	FJ809855	FJ809855		JQ954490
Tuber bellisporum JT7270 Oregon paratype	Tuber bellisporum	/gibbosum	gymnosperm	reticulated	JT7270	USA	FJ809856	FJ809856
Tuber beyeleri JT32597 Oregon	Tuber beyeleri	/maculatum	gymnosperm	reticulated	JT32597	USA	HM485408	JF419286	JX022570	JQ954491
Tuber borchii GB1 Italy	Tuber borchii	/puberulum	angiosperm & gymnosperm	reticulated	GB1	Italy	FJ809852	FJ809799	JX022571	JQ954492
Tuber borchii GB14 Italy	Tuber borchii	/puberulum	angiosperm & gymnosperm	reticulated	GB14	Italy	HM485344	JQ925682	JX022572	JQ954493
Tuber brumale GB21 Italy	Tuber brumale	/melanosporum	angiosperm & gymnosperm	spiny	GB52	Italy	HM485345	JQ925683		JQ954494
Tuber brumale GB22 Italy	Tuber brumale	/melanosporum	angiosperm & gymnosperm	spiny	GB53	Italy	FJ809852	JQ925684		JQ954495
Tuber californicum JT28058 California	Tuber californicum	/puberulum	angiosperm & gymnosperm	reticulated	JT28058	USA	HM485346	JQ925685	JX022574	JQ954496
Tuber canaliculatum JT28215 New Jersey	Tuber canaliculatum	/canaliculatum	gymnosperm	reticulated	JT28215	USA	JQ925643		JX022575	JQ954497
Tuber canaliculatum OSC59072 West Virginia	Tuber canaliculatum	/canaliculatum	gymnosperm	reticulated	OSC59072	USA	HM485347		JX022576	JQ954498
Tuber castellanoi JT19924 California paratype	Tuber castellanoi	/gibbosum	gymnosperm	reticulated	JT19924	USA	FJ809859	FJ809859
Tuber castellanoi JT28069 California holotype	Tuber castellanoi	/gibbosum	gymnosperm	reticulated	JT28069	USA	FJ809860	FJ809860		JQ954499
Tuber cf borchii China	Tuber sp33	/puberulum	gymnosperm	reticulated	GB312	China	HM485402	JQ925686	JX022573	JQ954500
Tuber dryophilum GB35 Italy	Tuber dryophilum	/puberulum	angiosperm & gymnosperm	reticulated	GB35	Italy	JQ925644	JQ925687	JX022577
Tuber dryophilum GB37 Italy	Tuber dryophilum	/puberulum	angiosperm & gymnosperm	reticulated	GB37	Italy	HM485354	JQ925688	JX022578	JQ954501
Tuber excavatum BM100 Spain	Tuber excavatum	/excavatum	angiosperm	reticulated	BM100	Spain	FJ748899	JQ925689
Tuber excavatum China GQ217540	Tuber excavatum	/excavatum	angiosperm	reticulated	GQ217540	China	GQ217540
Tuber excavatum OSC80639 Italy	Tuber excavatum	/excavatum	angiosperm	reticulated	OSC80639	Italy	HM485355	JQ925690
Tuber ferrugineum MA2721 Italy	Tuber ferrugineum	/rufum	angiosperm	reticulated	MA2721	Italy		FJ809809	JX022579
Tuber fulgens M2435 Italy	Tuber fulgens	/excavatum	angiosperm	reticulated	M2435	Italy	HM485358	JQ925691	JX022580
Tuber gennadii BM667 Spain	Tuber gennadii	/gennadii	angiosperm	reticulated	BM667	Spain	HM485359		JX022581	JQ954502
Tuber gennadii JT9627 Spain paratype	Tuber gennadii	/gennadii	angiosperm	reticulated	JT9627	Spain	HM485360	JQ925692	JX022582	JQ954503
Tuber gennadii M1904 Italy	Tuber lacunosum	/gennadii	angiosperm	reticulated	M1904	Italy	HM485361	JQ925693	JX022583	JQ954504
Tuber gibbosum JT26632 Washington	Tuber gibbosum	/gibbosum	gymnosperm	reticulated	JT26632	USA	FJ809862	FJ809862	JX022584	JQ954505
Tuber gibbosum JT30580 Oregon	Tuber gibbosum	/gibbosum	gymnosperm	reticulated	JT30580	USA	FJ809868	FJ809868	JX022585	JQ954506
Tuber indicum A GB236 China	Tuber indicum A	/melanosporum	angiosperm & gymnosperm	spiny-reticulated	GB236	China	FJ748906	JQ925694	JX022586	JQ954507
Tuber indicum A GB240 China	Tuber indicum A	/melanosporum	angiosperm & gymnosperm	spiny-reticulated	GB240	China	FJ748908	JQ925695	JX022587	JQ954508
Tuber indicum B GB237 China	Tuber indicum B	/melanosporum	angiosperm & gymnosperm	spiny-reticulated	GB237	China	FJ748907	FJ809840
Tuber indicum B GB339 China	Tuber indicum B	/melanosporum	angiosperm & gymnosperm	spiny-reticulated	GB339	China		FJ809822
Tuber indicum B JT29410 Oregon	Tuber indicum B	/melanosporum	angiosperm & gymnosperm	spiny-reticulated	JT29410	USA	FJ748902	JQ925696	JX022588	JQ954509
Tuber JT9769 Nepal	Tuber sp38	/puberulum	unknown	reticulated	JT9769	Nepal	HM485407	JQ925697
Tuber liaotongense OSC87602 China	Tuber liaotongense	/rufum	angiosperm & gymnosperm	spiny-reticulated	OSC87602	China		FJ809813	JX022589
Tuber lyonii GA21 Georgia	Tuber lyonii	/rufum	angiosperm	spiny	GB108	USA	FJ748910	JQ925698		JQ954510
Tuber lyonii OSC58244 Texas	Tuber lyonii	/rufum	angiosperm	spiny	OSC58244	USA		JQ925699		JQ954511
Tuber macrosporum JT13362 Italy	Tuber macrosporum	/canaliculatum	angiosperm	reticulated	JT13362	Italy	HM485373	FJ809838	JX022590
Tuber magnatum GB12 Italy	Tuber magnatum	/aestivum	angiosperm	reticulated	GB12	Italy	JQ925645	JQ925700	JX022591	JQ954512
Tuber magnatum GB13 Italy	Tuber magnatum	/aestivum	angiosperm	reticulated	GB13	Italy	JQ925646	JQ925701	JX022592	JQ954513
Tuber magnatum JT19460 Italy	Tuber magnatum	/aestivum	angiosperm	reticulated	JT19460	Italy	HM485374	FJ809848
Tuber malacodermum JT32319 Spain	Tuber malacodermum	/rufum	angiosperm	spiny	JT32319	Spain	FJ809889	JQ925702	JX022593	JQ954514
Tuber melanosporum GB200 Italy	Tuber melanosporum	/melanosporum	angiosperm	spiny	GB200	Italy	FJ748904	JQ925703	JX022594	JQ954515
Tuber mesentericum CW105 Sweden	Tuber mesentericum	/aestivum	angiosperm	reticulated	CW105	Sweden		JQ925704	JX022595	JQ954516
Tuber multimaculatum OSC62169 Spain paratype	Tuber multimaculatum	/multimaculatum	angiosperm	reticulated	OSC62169	Spain	HM485377	JQ925705	JX022596
Tuber nitidum BM105 Spain	Tuber nitidum	/rufum	angiosperm	spiny	BM105	Spain	FJ809885	FJ809807	JX022597	JQ954517
Tuber oregonense GB284 Oregon holotype	Tuber oregonense	/gibbosum	gymnosperm	reticulated	GB284	USA	FJ809874	FJ809874		JQ954518
Tuber oregonense JT27985 Oregon paratype	Tuber oregonense	/gibbosum	gymnosperm	reticulated	JT27985	USA	FJ809878	FJ809878	JX022598
Tuber oregonense JT30493 Oregon paratype	Tuber oregonense	/gibbosum	gymnosperm	reticulated	JT30493	USA	JQ925647	JQ925706	JX022599	JQ954519
Tuber panniferum JT12835 Spain	Tuber panniferum	/aestivum	angiosperm	spiny	JT12835	Spain	HM485380	FJ809846
Tuber panniferum JT4969 France	Tuber panniferum	/aestivum	angiosperm	spiny	JT4969	France		JQ925707
Tuber pseudoexcavatum CJ408 China	Tuber pseudoexcavatum	/melanosporum	angiosperm	reticulated	CJ408	China	HM485381	FJ809816
Tuber regimontanum ITCV909 Mexico holotype	Tuber regimontanum	/melanosporum	angiosperm	spiny-reticulated	ITCV909	Mexico	EU375838	EU375838	JX022600	JQ954520
Tuber rufum GB213 Italy	Tuber rufum	/rufum	angiosperm	spiny	GB213	Italy		FJ809811	JX022601
Tuber mexiusanum ITCV181 Mexico holotype	Tuber mexiusanum	/maculatum	angiosperm	reticulated	ITCV181	Mexico	HM485411	JF419293	JX022602
Tuber miquihuanense ITCV885 Mexico	Tuber miquihuanense	/maculatum	angiosperm	reticulated	ITCV885	Mexico	HM485414	JF419292	JX022603
Tuber shearii JT12498 North Carolina	Tuber shearii	/puberulum	angiosperm & gymnosperm	reticulated	JT12498	USA	GQ221450	JQ925708
Tuber shearii OSC51052 North Carolina	Tuber shearii	/puberulum	angiosperm & gymnosperm	reticulated	OSC51052	USA	HM485389			JQ954521
Tuber sp ITCV884 Mexico	Tuber sp65	/rufum	angiosperm	spiny	ITCV884	Mexico	HM485426		JX022605
Tuber sp ITCV908 Mexico	Tuber sp65	/rufum	angiosperm	spiny	ITCV908	Mexico	JQ925648	JQ925709		JQ954525
Tuber sp ITCV910 Mexico	Tuber sp79	/rufum	angiosperm	spiny	ITCV910	Mexico	JQ925649	JQ925710	JX022612	JQ954522
Tuber sp JT13224 West Virginia	Tuber sp57	/rufum	angiosperm	spiny	JT13224	USA	JQ925650	JQ925711		JQ954526
Tuber sp JT28121 Japan	Tuber sp70	/puberulum	angiosperm	reticulated	JT28121	Japan	HM485429	JQ925712
Tuber sp JT32567 Mexico	Tuber sp80	/rufum	angiosperm	spiny	JT32567	Mexico	JQ925651		JX022606
Tuber sp JT8755 Florida	Tuber sp47	/maculatum	angiosperm	reticulated	JT8755	USA	HM485416	JF419285
Tuber sp RH73 Iowa	Tuber sp13	/melanosporum	gymnosperm	spiny	RH73	USA	GQ221451	JQ925713	JX022610	JQ954523
Tuber sp RH8270753 Iowa	Tuber sp60	/rufum	angiosperm	spiny	RH8270753	USA	JQ925652		JX022604	JQ954524
Tuber sp TB10248 New York	Tuber sp60	/rufum	angiosperm	spiny	TB10248	USA	JQ925653	JQ925714	JX022607
Tuber sp1 K201 Japan	Tuber sp74	/canaliculatum	angiosperm	reticulated	K201	Japan	AB553344	AB553512	AB553532	AB553552
Tuber sp14 K186 Japan	Tuber sp14	/puberulum	angiosperm	reticulated	K186	Japan	AB553464	AB553525	AB553545	AB553565
Tuber sp2 K215 Japan	Tuber sp75	/canaliculatum	angiosperm	reticulated	K215	Japan	AB553356	AB553513	AB553533	AB553553
Tuber sp8 K228 Japan	Tuber sp77	/japonicum	gymnosperm	reticulated	K228	Japan	AB553434	AB553519	AB553539	AB553559
Tuber sp9 K213 Japan	Tuber sp78	/japonicum	gymnosperm	reticulated	K213	Japan	AB553446	AB553520	AB553540	AB553560
Tuber sphaerosporum JT12487 Oregon	Tuber sphaerosporum	/puberulum	angiosperm	reticulated	JT12487	USA	FJ809853	FJ809853	JX022609
Tuber sphaerosporum JT19772 Oregon	Tuber sphaerosporum	/puberulum	angiosperm	reticulated	JT19772	USA	FJ809854	FJ809854
Tuber spinoreticulatum U188 Maryland isotype	Tuber spinoreticulatum	/rufum	angiosperm	spiny-reticulated	U188	USA	FJ809884	FJ809815	JX022608	JQ954527
Underwoodia beatonii JT28375 Australia	Underwoodia beatonii	/gymnohydnotrya	angiosperm		JT28375	Australia	JQ925654	JQ925715	JX022614
Underwoodia beatonii JT28380 Australia	Underwoodia beatonii	/gymnohydnotrya	angiosperm		JT28380	Australia	JQ925655	JQ925716	JX022613	JQ954528
Underwoodia columnaris U42685	Underwoodia columnaris	/gymnohydnotrya	angiosperm		U42685	USA		U42685
Underwoodia singeri JT26159	Underwoodia singeri	/gymnohydnotrya	angiosperm		JT26159	Chile		JQ925717
Underwoodia singeri mes161 Chile	Underwoodia cf singeri	/gymnohydnotrya	angiosperm		MES161	Chile	JQ925656	JQ925718	JX022615	JQ954529
