# Supplementary material for: Historical Biogeography and Diversification of Truffles in the Tuberaceae and Their Newly Identified Southern Hemisphere Sister Lineage
Source: PLoS One. 2013 Jan 2;8(1):e52765. doi: 10.1371/journal.pone.0052765 (PMC3534693; doi:10.1371/journal.pone.0052765)
Supplement: Table S3 — Economically important Tuber species determined by 2009 market prices (USD) in the USA. (XLS) [file pone.0052765.s003.xls]

## Sheet: Sheet1
Table S2. Economically important Tuber species determined by 2009 market prices (USD) in the USA
Species	Market price (per lb/per kg)	Lineage	Source
Tuber borchii	$200 / $440	/puberulum	Europe
Tuber brumale	$300 / $660	/melanosporum	Europe
Tuber canaliculatum	$100 / $220	/macrosporum	North America
Tuber gibbosum	$100 / $220	/gibbosum	North America
Tuber indicum	$50 / $110	/melanosporum	Asia
Tuber lyonii	$100 / $220	/rufum	North America
Tuber macrosporum	$300 / $660	/macrosporum	Europe
Tuber magnatum	$2300 / $5060	/aestivum	Europe
Tuber melanosporum	$800 / $1760	/melanosporum	Europe
Tuber oregonense	$100 / $220	/gibbosum	North America
